# Supplementary material for: Efficacy, duration of protection, birth outcomes, and infant growth associated with influenza vaccination in pregnancy: a pooled analysis of three randomised controlled trials
Source: PubMed Central journal article supplement (PMC7284303; doi:10.1016/s2213-2600(19)30479-5), 2020-06
Supplement: mmc1.pdf [file mmc1.pdf]

# THE LANCET

## Respiratory Medicine

### Supplementary appendix

This appendix formed part of the original submission and has been peer reviewed. We post it as supplied by the authors.

Supplement to: Omer SB, Clark DR, Madhi SA, et al, for the BMGF Supported Maternal Influenza Immunization Trials Investigators Group. Efficacy, duration of protection, birth outcomes, and infant growth associated with influenza vaccination in pregnancy: a pooled analysis of three randomised controlled trials. *Lancet Respir Med* 2020; **8**: 597–608.

## **SUPPLEMENTAL MATERIALS**

### **BMGF Supported Maternal Influenza Immunization Trials Investigators Group**

Ordered by site and alphabetically.

Mali: William Blackwelder, PhD; Joseph Bresee, MD; Flanon Coulibaly, MD; Boubacar Diallo; Fatoumata Diallo, MD; Wilbur Chen, MD, MS; Moussa Doumbia, MD; Fadima Cheick Haidara, MD; Adama Mamby Keita, MD, Alexander Klimov, PhD; Mamoudou Kodio, PharmD; Karen Kotloff, MD; Myron M. Levine, MD, DTPH; Vladimir Mishcherkin MS; Uma Onwuchekwa; Sandra Panchalingam, PhD; Marcela Pasetti, PhD; Doh Sanogo, MD; Samba Sow, MD MS; Milagritos Tapia, MD; Boubou Tamboura, PharmD; Ibrahim Teguete, MD; Sharon Tennant, PhD, Awa Traore, PharmD; and John Treanor, MD.

Nepal: Janet A. Englund, MD; Joanne Katz, ScD; Subarna K. Khatry, MD; Jane Kuypers, PhD; Steven C. LeClerq, MPH; Luke C. Mullany, PhD; Laxman Shrestha, MD; Mark C. Steinhoff, MD; and James M. Tielsch, PhD.

South Africa: Peter V. Adrian, PhD; Clare L. Cutland, MD; Andrea Hugo, MD; Stephanie Jones, MD; Locadiah Kuwanda, MSc; Keith P. Klugman, MD, PhD; Shabir A. Madhi, MD, PhD; Kathleen M. Neuzil, MD; Nadia van Niekerk, BTech; Marta C. Nunes, PhD; Justin R. Ortiz, MD; Eric A.F. Simões, MD; Florette Treurnicht, PhD; Marietjie Venter, PhD; Avy Violari, MD; and Adriana Weinberg, MD.

**Table S1.** Efficacy of maternal IIV on first episodes of PCR-confirmed influenza in infants born to women vaccinated at any time pre-partum

|                          | Intervention |             |                        | Control |             |                        | Risk Ratio<br>(95% Confidence Interval) | Vaccine Efficacy %<br>(95% Confidence Interval) | P-Value |
|--------------------------|--------------|-------------|------------------------|---------|-------------|------------------------|-----------------------------------------|-------------------------------------------------|---------|
|                          | Cases        | No. Infants | Incidence <sub>1</sub> | Cases   | No. Infants | Incidence <sub>1</sub> |                                         |                                                 |         |
| <b>≤ 2 months of age</b> |              |             |                        |         |             |                        |                                         |                                                 |         |
| Nepal                    | 20           | 1820        | 11.0                   | 30      | 1826        | 16.4                   | 0.67 (0.38, 1.17)                       | 33 (-17, 62)                                    | 0.2     |
| Mali                     | 2            | 2064        | 1.0                    | 10      | 2041        | 4.9                    | 0.20 (0.04, 0.90)                       | 80 (10, 96)                                     | 0.02    |
| South Africa             | 2            | 1026        | 1.9                    | 13      | 1023        | 12.7                   | 0.15 (0.03, 0.68)                       | 85 (32, 97)                                     | 0.004   |
| Pooled                   | 24           | 4910        | 4.9                    | 53      | 4890        | 10.8                   | 0.45 (0.28, 0.73)                       | 55 (27, 72)                                     | 0.001   |
| <b>≤ 4 months of age</b> |              |             |                        |         |             |                        |                                         |                                                 |         |
| Nepal                    | 42           | 1820        | 23.1                   | 60      | 1826        | 32.8                   | 0.70 (0.48, 1.04)                       | 30 (-4, 52)                                     | 0.09    |
| Mali                     | 11           | 2064        | 5.3                    | 33      | 2041        | 16.2                   | 0.33 (0.17, 0.65)                       | 67 (35, 83)                                     | <0.001  |
| South Africa             | 14           | 1026        | 13.6                   | 30      | 1023        | 29.3                   | 0.46 (0.25, 0.87)                       | 54 (13, 75)                                     | 0.01    |
| Pooled                   | 67           | 4910        | 13.6                   | 123     | 4890        | 25.2                   | 0.54 (0.40, 0.73)                       | 46 (27, 60)                                     | <0.0001 |
| <b>≤ 6 months of age</b> |              |             |                        |         |             |                        |                                         |                                                 |         |
| Nepal                    | 72           | 1820        | 39.6                   | 101     | 1826        | 55.3                   | 0.72 (0.53, 0.96)                       | 28 (4, 47)                                      | 0.03    |
| Mali                     | 50           | 2064        | 24.2                   | 75      | 2041        | 36.7                   | 0.66 (0.46, 0.94)                       | 34 (6, 54)                                      | 0.02    |
| South Africa             | 19           | 1026        | 18.5                   | 37      | 1023        | 36.1                   | 0.51 (0.30, 0.88)                       | 49 (12, 70)                                     | 0.01    |
| Pooled                   | 141          | 4910        | 28.7                   | 213     | 4890        | 43.6                   | 0.66 (0.54, 0.81)                       | 34 (19, 46)                                     | <0.0001 |

<sub>1</sub> Per 1,000 infants

**Table S2.** Efficacy of maternal IIV on first episodes of PCR-confirmed influenza in women vaccinated at any time pre-partum

|                                     | Intervention |              |                        | Control |              |                        | Risk Ratio<br>(95% Confidence Interval) | Vaccine Efficacy %<br>(95% Confidence Interval) | P-Value |
|-------------------------------------|--------------|--------------|------------------------|---------|--------------|------------------------|-----------------------------------------|-------------------------------------------------|---------|
|                                     | Cases        | No.<br>Women | Incidence <sub>1</sub> | Cases   | No.<br>Women | Incidence <sub>1</sub> |                                         |                                                 |         |
| <b>During Pregnancy<sub>2</sub></b> |              |              |                        |         |              |                        |                                         |                                                 |         |
| Nepal                               | 19           | 1847         | 10.3                   | 23      | 1846         | 12.4                   | 0.82 (0.45, 1.51)                       | 18 (-51, 55)                                    | 0.54    |
| Mali                                | 6            | 2108         | 2.8                    | 17      | 2085         | 8.2                    | 0.35 (0.14, 0.88)                       | 65 (12, 86)                                     | 0.02    |
| South Africa                        | 11           | 1062         | 10.4                   | 19      | 1054         | 18.0                   | 0.57 (0.27, 1.20)                       | 43 (-20, 73)                                    | 0.14    |
| Pooled                              | 36           | 5017         | 7.2                    | 59      | 4985         | 11.8                   | 0.61 (0.40, 0.92)                       | 39 (8, 60)                                      | 0.02    |
| <b>After Pregnancy<sub>2</sub></b>  |              |              |                        |         |              |                        |                                         |                                                 |         |
| Nepal                               | 12           | 1847         | 6.5                    | 19      | 1846         | 10.3                   | 0.63 (0.31, 1.30)                       | 27 (-30, 69)                                    | 0.14    |
| Mali                                | 7            | 2108         | 3.3                    | 23      | 2085         | 11.0                   | 0.30 (0.13, 0.70)                       | 70 (30, 87)                                     | 0.003   |
| South Africa                        | 6            | 1062         | 5.6                    | 19      | 1054         | 18                     | 0.31 (0.12, 0.78)                       | 67 (17, 87)                                     | 0.01    |
| Pooled                              | 25           | 5017         | 5.0                    | 61      | 4985         | 12.2                   | 0.41 (0.26, 0.65)                       | 59 (35, 74)                                     | <0.0001 |
| <b>During Full Study Period</b>     |              |              |                        |         |              |                        |                                         |                                                 |         |
| Nepal                               | 31           | 1847         | 16.8                   | 42      | 1846         | 22.8                   | 0.74 (0.46, 1.17)                       | 26 (-17, 54)                                    | 0.2     |
| Mali                                | 12           | 2108         | 5.7                    | 40      | 2085         | 19.2                   | 0.30 (0.16, 0.56)                       | 70 (44, 84)                                     | <0.0001 |
| South Africa                        | 19           | 1062         | 17.9                   | 38      | 1054         | 36.0                   | 0.50 (0.29, 0.86)                       | 49 (12, 70)                                     | 0.01    |
| Pooled                              | 62           | 5017         | 12.4                   | 120     | 4985         | 24.1                   | 0.51 (0.38, 0.70)                       | 48 (30, 42)                                     | <0.0001 |

<sub>1</sub> Per 1,000 women

<sub>2</sub> Women missing a date of delivery were excluded from the during/after analyses

**Table S3.** Efficacy of maternal IIV on episodes of PCR-confirmed influenza in infants born to women vaccinated at any time pre-partum by strain

|              | Intervention |             |                        | Control |             |                        | Incidence Rate Ratio<br>(95% Confidence Interval) | Vaccine Efficacy %<br>(95% Confidence Interval) | P-Value |
|--------------|--------------|-------------|------------------------|---------|-------------|------------------------|---------------------------------------------------|-------------------------------------------------|---------|
|              | Cases        | Person-time | Incidence <sub>1</sub> | Cases   | Person-time | Incidence <sub>1</sub> |                                                   |                                                 |         |
| <b>H3N2</b>  |              |             |                        |         |             |                        |                                                   |                                                 |         |
| Nepal        | 18           | 896.9       | 20.1                   | 35      | 899.9       | 38.9                   | 0.52 (0.29, 0.91)                                 | 48 (9, 71)                                      | 0.02    |
| Mali         | 22           | 931.0       | 10.6                   | 36      | 929.0       | 17.6                   | 0.61 (0.36, 1.04)                                 | 39 (-4, 64)                                     | 0.07    |
| South Africa | 7            | 468.5       | 14.9                   | 14      | 466.8       | 30.0                   | 0.50 (0.20, 1.23)                                 | 50 (-23, 80)                                    | 0.13    |
| Pooled       | 47           | 2296.4      | 20.5                   | 85      | 2295.7      | 37.0                   | 0.55 (0.39, 0.79)                                 | 45 (21, 61)                                     | 0.001   |
| <b>H1N1</b>  |              |             |                        |         |             |                        |                                                   |                                                 |         |
| Nepal        | 6            | 896.9       | 6.7                    | 23      | 899.9       | 25.6                   | 0.26 (0.11, 0.64)                                 | 64 (22, 83)                                     | 0.003   |
| Mali         | 12           | 931.0       | 12.9                   | 28      | 929.0       | 30.1                   | 0.43 (0.22, 0.84)                                 | 57 (16, 78)                                     | 0.01    |
| South Africa | 0            | 468.5       | 0.0                    | 1       | 466.8       | 2.1                    | --                                                | --                                              | --      |
| Pooled       | 18           | 2296.4      | 7.8                    | 52      | 2295.7      | 22.6                   | 0.35 (0.20, 0.59)                                 | 65 (41, 80)                                     | 0.001   |
| <b>B</b>     |              |             |                        |         |             |                        |                                                   |                                                 |         |
| Nepal        | 42           | 896.9       | 46.8                   | 42      | 899.9       | 46.7                   | 1.00 (0.65, 1.54)                                 | 0 (-54, 35)                                     | 0.99    |
| Mali         | 14           | 931.0       | 15.0                   | 13      | 929.0       | 14.0                   | 1.07 (0.50, 2.29)                                 | -7 (-129, 50)                                   | 0.85    |
| South Africa | 12           | 468.5       | 25.6                   | 23      | 466.8       | 49.3                   | 0.52 (0.26, 1.04)                                 | 48 (-4, 74)                                     | 0.06    |
| Pooled       | 68           | 2296.4      | 29.6                   | 78      | 2295.7      | 34.0                   | 0.87 (0.63, 1.21)                                 | 13 (-21, 37)                                    | 0.41    |

<sub>1</sub> Per 1,000 infant-years

**Table S4.** Efficacy of maternal IIV on episodes of PCR-confirmed influenza in pregnant women vaccinated at any time pre-partum by strain

|              | Intervention |             |                        | Control |             |                        | Incidence Rate Ratio<br>(95% Confidence Interval) | Vaccine Efficacy %<br>(95% Confidence Interval) | P-Value |
|--------------|--------------|-------------|------------------------|---------|-------------|------------------------|---------------------------------------------------|-------------------------------------------------|---------|
|              | Cases        | Person-time | Incidence <sub>1</sub> | Cases   | Person-time | Incidence <sub>1</sub> |                                                   |                                                 |         |
| <b>H3N2</b>  |              |             |                        |         |             |                        |                                                   |                                                 |         |
| Nepal        | 9            | 1471.3      | 6.1                    | 11      | 1466.4      | 7.5                    | 0.82 (0.34, 1.97)                                 | 18 (-97, 46)                                    | 0.65    |
| Mali         | 5            | 1259.6      | 4.0                    | 7       | 1253.8      | 5.6                    | 0.71 (0.22, 2.24)                                 | 29 (-124, 78)                                   | 0.56    |
| South Africa | 10           | 707.4       | 14.1                   | 22      | 700.8       | 31.4                   | 0.45 (0.21, 0.95)                                 | 55 (5, 79)                                      | 0.04    |
| Pooled       | 24           | 2417.3      | 9.9                    | 40      | 2404.4      | 16.6                   | 0.60 (0.36, 0.99)                                 | 40 (1, 64)                                      | 0.04    |
| <b>H1N1</b>  |              |             |                        |         |             |                        |                                                   |                                                 |         |
| Nepal        | 9            | 1471.3      | 6.1                    | 6       | 1466.4      | 4.1                    | 1.50 (0.53, 4.20)                                 | -50 (-320, 47)                                  | 0.44    |
| Mali         | 3            | 1259.6      | 2.4                    | 19      | 1253.8      | 15.2                   | 0.16 (0.05, 0.53)                                 | 84 (47, 95)                                     | 0.003   |
| South Africa | 5            | 707.4       | 7.1                    | 6       | 700.8       | 8.6                    | 0.82 (0.25, 2.70)                                 | 18 (-170, 75)                                   | 0.75    |
| Pooled       | 17           | 2417.3      | 7                      | 31      | 2404.4      | 12.9                   | 0.54 (0.30, 0.98)                                 | 46 (2, 70)                                      | 0.04    |
| <b>B</b>     |              |             |                        |         |             |                        |                                                   |                                                 |         |
| Nepal        | 10           | 1471.3      | 6.8                    | 23      | 1466.4      | 15.7                   | 0.43 (0.21, 0.91)                                 | 57 (9, 79)                                      | 0.03    |
| Mali         | 4            | 1259.6      | 3.2                    | 15      | 1253.8      | 12.0                   | 0.26 (0.09, 0.80)                                 | 74 (20, 91)                                     | 0.02    |
| South Africa | 4            | 707.4       | 5.6                    | 10      | 700.8       | 14.3                   | 0.40 (0.12, 1.26)                                 | 60 (-26, 88)                                    | 0.12    |
| Pooled       | 18           | 2417.3      | 7.4                    | 48      | 2404.4      | 20.0                   | 0.37 (0.22, 0.64)                                 | 63 (36, 78)                                     | <0.0001 |

<sub>1</sub> Per 1,000 person-years

**Table S5.** Pooled impact of maternal IIV on 6-month old infant **weight-for-age** by LBW, preterm birth, and SGA

|                      | Intervention   |                        | Control     |                        | RR   | 95% CI       | P-Value | Intervention   |                        | Control |       | RR   | 95% CI       | P-Value |
|----------------------|----------------|------------------------|-------------|------------------------|------|--------------|---------|----------------|------------------------|---------|-------|------|--------------|---------|
|                      | No. Infants    | Incidence <sub>1</sub> | No. Infants | Incidence <sub>1</sub> |      |              |         | No. Infants    | Incidence <sub>1</sub> |         |       |      |              |         |
|                      | <b>Non-LBW</b> |                        |             |                        |      |              |         | <b>LBW</b>     |                        |         |       |      |              |         |
| Underweight          | 248            | 81.7                   | 254         | 84.8                   | 0.96 | (0.82, 1.14) | 0.67    | 149            | 309.8                  | 146     | 308.7 | 1.00 | (0.83, 1.21) | 0.97    |
| Severely Underweight | 46             | 15.2                   | 53          | 17.7                   | 0.86 | (0.58, 1.27) | 0.44    | 45             | 93.6                   | 49      | 103.6 | 0.90 | (0.61, 1.33) | 0.60    |
|                      | <b>Term</b>    |                        |             |                        |      |              |         | <b>Preterm</b> |                        |         |       |      |              |         |
| Underweight          | 329            | 104.0                  | 321         | 102.6                  | 1.01 | (0.88, 1.17) | 0.86    | 77             | 202.1                  | 83      | 223.7 | 0.90 | (0.68, 1.19) | 0.47    |
| Severely Underweight | 62             | 19.6                   | 74          | 23.7                   | 0.83 | (0.59, 1.16) | 0.27    | 30             | 78.7                   | 28      | 75.5  | 1.04 | (0.64, 1.71) | 0.87    |
|                      | <b>AGA</b>     |                        |             |                        |      |              |         | <b>SGA</b>     |                        |         |       |      |              |         |
| Underweight          | 136            | 69.7                   | 142         | 73.1                   | 0.95 | (0.76, 1.20) | 0.68    | 172            | 214.7                  | 173     | 221.8 | 0.97 | (0.80, 1.17) | 0.73    |
| Severely Underweight | 26             | 13.3                   | 23          | 11.8                   | 1.12 | (0.64, 1.97) | 0.68    | 47             | 58.7                   | 54      | 69.2  | 0.85 | (0.58, 1.24) | 0.39    |

<sub>1</sub> Per 1,000 infants

**Table S6.** Pooled impact of maternal IIV on 6-month old infant **weight-for-length** by LBW, preterm birth, and SGA

|                | Intervention   |                        | Control     |                        | RR   | 95% CI       | P-Value | Intervention   |                        | Control |       | RR   | 95% CI       | P-Value |
|----------------|----------------|------------------------|-------------|------------------------|------|--------------|---------|----------------|------------------------|---------|-------|------|--------------|---------|
|                | No. Infants    | Incidence <sub>1</sub> | No. Infants | Incidence <sub>1</sub> |      |              |         | No. Infants    | Incidence <sub>1</sub> |         |       |      |              |         |
|                | <b>Non-LBW</b> |                        |             |                        |      |              |         | <b>LBW</b>     |                        |         |       |      |              |         |
| Wasting        | 279            | 92.0                   | 274         | 91.5                   | 1.01 | (0.86, 1.18) | 0.95    | 80             | 166.3                  | 74      | 156.4 | 1.06 | (0.80, 1.42) | 0.68    |
| Severe Wasting | 78             | 25.7                   | 86          | 28.7                   | 0.90 | (0.66, 1.21) | 0.47    | 24             | 49.9                   | 23      | 48.6  | 1.03 | (0.59, 1.79) | 0.93    |
|                | <b>Term</b>    |                        |             |                        |      |              |         | <b>Preterm</b> |                        |         |       |      |              |         |
| Wasting        | 306            | 96.7                   | 302         | 96.6                   | 1.00 | (0.86, 1.16) | 0.99    | 59             | 154.8                  | 48      | 129.4 | 1.20 | (0.84, 1.70) | 0.32    |
| Severe Wasting | 89             | 28.1                   | 93          | 29.7                   | 0.94 | (0.71, 1.26) | 0.70    | 13             | 34.1                   | 17      | 45.8  | 0.74 | (0.37, 1.51) | 0.42    |
|                | <b>AGA</b>     |                        |             |                        |      |              |         | <b>SGA</b>     |                        |         |       |      |              |         |
| Wasting        | 171            | 87.6                   | 156         | 80.3                   | 1.09 | (0.89, 1.34) | 0.41    | 122            | 152.3                  | 119     | 152.6 | 1.00 | (0.79, 1.26) | 0.99    |
| Severe Wasting | 45             | 23.1                   | 45          | 23.2                   | 1.00 | (0.66, 1.50) | 0.98    | 42             | 52.4                   | 41      | 52.6  | 1.00 | (0.66, 1.52) | 0.99    |

<sub>1</sub> Per 1,000 infants



**Table S7.** Pooled impact of maternal IIV on 6-month old infant **length-for-age** by preterm birth, SGA and LBW

|                 | Intervention   |                        | Control     |                        | RR   | 95% CI       | P-Value | Intervention   |                        | Control |       | RR   | 95% CI       | P-Value |
|-----------------|----------------|------------------------|-------------|------------------------|------|--------------|---------|----------------|------------------------|---------|-------|------|--------------|---------|
|                 | No. Infants    | Incidence <sub>1</sub> | No. Infants | Incidence <sub>1</sub> |      |              |         | No. Infants    | Incidence <sub>1</sub> |         |       |      |              |         |
|                 | <b>Non-LBW</b> |                        |             |                        |      |              |         | <b>LBW</b>     |                        |         |       |      |              |         |
| Stunting        | 299            | 98.5                   | 326         | 108.8                  | 0.91 | (0.78, 1.05) | 0.19    | 139            | 289.0                  | 136     | 287.5 | 1.01 | (0.82, 1.23) | 0.96    |
| Severe Stunting | 70             | 23.1                   | 85          | 28.4                   | 0.81 | (0.59, 1.11) | 0.19    | 46             | 95.6                   | 46      | 97.3  | 0.98 | (0.67, 1.45) | 0.93    |
|                 | <b>Term</b>    |                        |             |                        |      |              |         | <b>Preterm</b> |                        |         |       |      |              |         |
| Stunting        | 362            | 114.4                  | 385         | 123.1                  | 0.93 | (0.81, 1.06) | 0.29    | 81             | 212.6                  | 82      | 221.0 | 0.96 | (0.73, 1.26) | 0.78    |
| Severe Stunting | 85             | 26.9                   | 108         | 34.5                   | 0.78 | (0.59, 1.03) | 0.08    | 31             | 81.4                   | 26      | 70.1  | 1.16 | (0.70, 1.92) | 0.56    |
|                 | <b>AGA</b>     |                        |             |                        |      |              |         | <b>SGA</b>     |                        |         |       |      |              |         |
| Stunting        | 187            | 95.8                   | 219         | 112.7                  | 0.85 | (0.71, 1.02) | 0.09    | 137            | 171.0                  | 130     | 166.7 | 1.03 | (0.82, 1.28) | 0.82    |
| Severe Stunting | 47             | 24.1                   | 54          | 27.8                   | 0.87 | (0.59, 1.28) | 0.47    | 32             | 40.0                   | 34      | 43.6  | 0.92 | (0.57, 1.47) | 0.72    |

<sub>1</sub> Per 1,000 infant-years

**Table S8.** Median infant centile change from birth to 6 months

|               | Intervention  |               | Control       |               | P-Value <sub>1</sub> |
|---------------|---------------|---------------|---------------|---------------|----------------------|
|               | Median Change | (IQR)         | Median Change | (IQR)         |                      |
| <b>Weight</b> |               |               |               |               |                      |
| Nepal         | 0.2           | (-13.8, 15.5) | 0.8           | (-11.8, 17.9) | 0.18                 |
| Mali          | 2.7           | (-16.0, 25.2) | 3.4           | (-14.5, 26.6) | 0.15                 |
| South Africa  | 11.8          | (-3.6, 33.2)  | 8.7           | (-10.5, 32.2) | 0.05                 |
| Pooled        | 2.7           | (-13.3, 23.8) | 3.1           | (-12.8, 24.3) | 0.44                 |
| <b>Length</b> |               |               |               |               |                      |
| Nepal         | -1.8          | (-20.4, 12.0) | -1.0          | (-19.9, 11.2) | 0.57                 |
| Mali          | -0.6          | (-24.3, 22.0) | 0             | (-24.6, 20.8) | 0.94                 |
| South Africa  | -12.5         | (-50.8, 12.2) | -15.9         | (-57.9, 11.8) | 0.12                 |
| Pooled        | -3.8          | (-30.1, 14.9) | -4.0          | (-30.3, 13.5) | 0.71                 |

<sub>1</sub> Intervention and control compared using Wilcoxon Rank Sum Test

**Table S9.** Mean weight (kg) and length (cm) of infants by age and site

|                 | Weight (SD)  |             |                      | Length (SD)  |              |                      |
|-----------------|--------------|-------------|----------------------|--------------|--------------|----------------------|
|                 | Intervention | Control     | P-Value <sub>1</sub> | Intervention | Control      | P-Value <sub>1</sub> |
| <b>Birth</b>    |              |             |                      |              |              |                      |
| Nepal           | 2.90 (0.55)  | 2.88 (0.56) | 0.30                 | 48.29 (2.52) | 48.22 (2.56) | 0.51                 |
| Mali            | 3.02 (0.47)  | 3.02 (0.44) | 0.86                 | 49.49 (1.91) | 49.54 (1.80) | 0.37                 |
| South Africa    | 3.06 (0.48)  | 3.08 (0.48) | 0.27                 | 49.78 (3.44) | 49.97 (3.41) | 0.21                 |
| Pooled          | 2.31 (1.32)  | 2.30 (1.31) | 0.87                 | 49.20 (2.58) | 49.25 (2.56) | 0.38                 |
| <b>6 months</b> |              |             |                      |              |              |                      |
| Nepal           | 6.80 (0.97)  | 6.79 (1.02) | 0.75                 | 64.39 (2.39) | 64.33 (2.54) | 0.53                 |
| Mali            | 7.30 (0.97)  | 7.32 (0.98) | 0.58                 | 66.60 (2.63) | 66.63 (2.53) | 0.76                 |
| South Africa    | 7.54 (1.12)  | 7.52 (1.07) | 0.71                 | 65.07 (4.22) | 64.89 (4.49) | 0.44                 |
| Pooled          | 7.17 (1.04)  | 7.17 (1.05) | 0.95                 | 65.49 (3.12) | 65.44 (3.22) | 0.56                 |

<sub>1</sub> Intervention and control compared using two-sample t-test

**Table S10.** I-squared test of heterogeneity based on meta-analysis of risk ratios across sites

| Time Frame                        | Strain | Gestational Age at Vaccination | I <sub>2</sub> (%) |
|-----------------------------------|--------|--------------------------------|--------------------|
| <b>Infants</b>                    |        |                                |                    |
| ≤ 2 Months of Age                 | All    | All                            | 60.1               |
| ≤ 4 Months of Age                 | All    | All                            | 49.4               |
| ≤ 6 Months of Age                 | All    | All                            | 0                  |
| > 2, ≤ 4 Months of Age            | All    | All                            | 0                  |
| > 4, ≤ 6 Months of Age            | All    | All                            | 0                  |
| ≤ 6 Months of Age                 | H3N2   | All                            | 0                  |
| ≤ 6 Months of Age                 | H1N1   | All                            | 0                  |
| ≤ 6 Months of Age                 | Flu B  | All                            | 27.0               |
| ≤ 6 Months of Age                 | All    | <29 weeks                      | 0                  |
| ≤ 6 Months of Age                 | All    | ≥29 weeks                      | 0                  |
| LBW                               | -      | All                            | 62.6               |
| Stillbirth                        | -      | All                            | 7.6                |
| Preterm birth                     | -      | All                            | 0                  |
| SGA                               | -      | All                            | 0                  |
| Underweight                       | -      | All                            | 0                  |
| Severely underweight              | -      | All                            | 0                  |
| Wasting                           | -      | All                            | 0                  |
| Severe wasting                    | -      | All                            | 20.8               |
| Stunting                          | -      | All                            | 58.4               |
| Severe stunting                   | -      | All                            | 23.4               |
| <b>Women</b>                      |        |                                |                    |
| During Pregnancy                  | All    | All                            | 15.2               |
| After Pregnancy                   | All    | All                            | 8.9                |
| Full Study                        | All    | All                            | 60.8               |
| ≤ 2 Months After Vaccination      | All    | All                            | 0                  |
| ≤ 4 Months After Vaccination      | All    | All                            | 63.5               |
| ≤ 6 Months After Vaccination      | All    | All                            | 76.2               |
| > 2, ≤ 4 Months After Vaccination | All    | All                            | 50.6               |
| > 4, ≤ 6 Months After Vaccination | All    | All                            | 40.4               |
| Full Study                        | H3N2   | All                            | 0                  |
| Full Study                        | H1N1   | All                            | 75.5               |
| Full Study                        | Flu B  | All                            | 0                  |
| Full Study                        | All    | <29 weeks                      | 0                  |
| Full Study                        | All    | ≥29 weeks                      | 39.2               |
